# Supplementary material for: Near-infrared spectroscopic identification and quantification of active pharmaceutical ingredients in closed capsules: a feasibility study for pediatric doses
Source: Royal Society of Chemistry journal article supplement (doi:10.1039/c9ay01241a), 2019-01-01
Supplement: c9ay01241a4.pdf [file c9ay01241a4.pdf]

### Vorhersage vs Wahr / Nom. API-content [mq] / Kreuzvalidierung

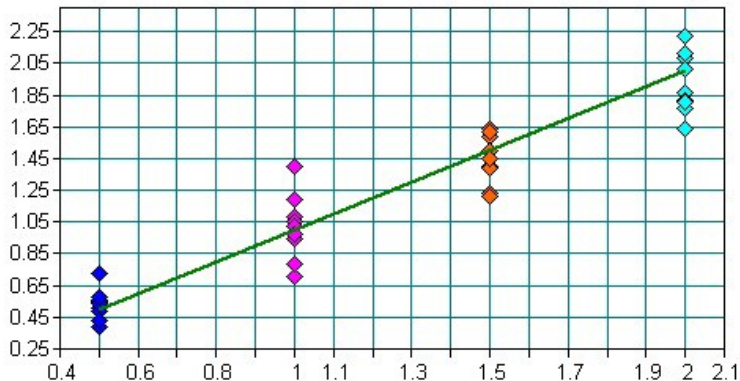

Rang: 9     $R^2 = 91.46$     RMSECV = 0.163    Bias: 0.00712    RPD: 3.43  
Validation No 6    KAPKnauerohneSpiegel\_A-D\_alle\_Nom.API-Content in mg.q2
