# Supplementary material for: Near-infrared spectroscopic identification and quantification of active pharmaceutical ingredients in closed capsules: a feasibility study for pediatric doses
Source: Royal Society of Chemistry journal article supplement (doi:10.1039/c9ay01241a), 2019-01-01
Supplement: c9ay01241a12.pdf [file c9ay01241a12.pdf]

### RMSECV vs Rang / Nom. API-content [mg] / Kreuzvalidierung

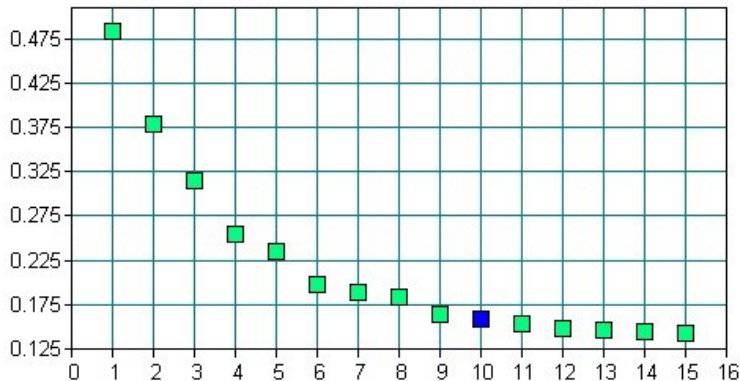

Empf. Rang: 10

$R^2 = 91.91$

RMSECV = 0.159

Validation No 7

KAPKnaurohneSpiegel\_A-D\_alle\_Nom.API-Content in mg.q2
