# Supplementary material for: Near-infrared spectroscopic identification and quantification of active pharmaceutical ingredients in closed capsules: a feasibility study for pediatric doses
Source: Royal Society of Chemistry journal article supplement (doi:10.1039/c9ay01241a), 2019-01-01
Supplement: c9ay01241a13.pdf [file c9ay01241a13.pdf]

**RMSECV vs Rang / Nom. API-content [mg] / Kreuzvalidierung**

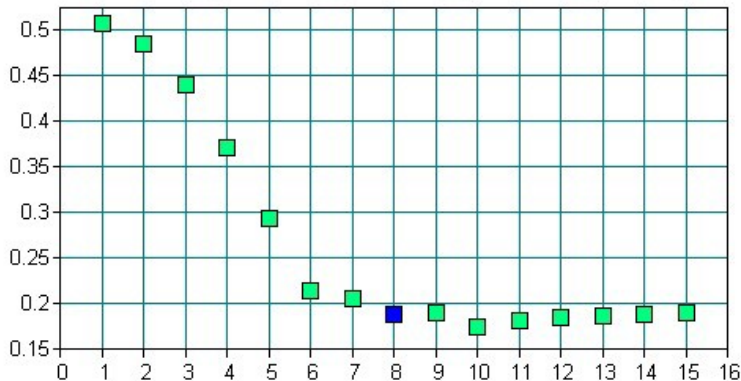

Empf. Rang: 8

$R^2 = 88.74$

RMSECV = 0.188

Validation No 5

KAPKnauermitSpiegelA-Dalle\_API-content in mg\_final.q2
