# Supplementary material for: Near-infrared spectroscopic identification and quantification of active pharmaceutical ingredients in closed capsules: a feasibility study for pediatric doses
Source: Royal Society of Chemistry journal article supplement (doi:10.1039/c9ay01241a), 2019-01-01
Supplement: c9ay01241a14.pdf [file c9ay01241a14.pdf]

### RMSECV vs Rang / Nom. API-concentr. [%] / Kreuzvalidierung

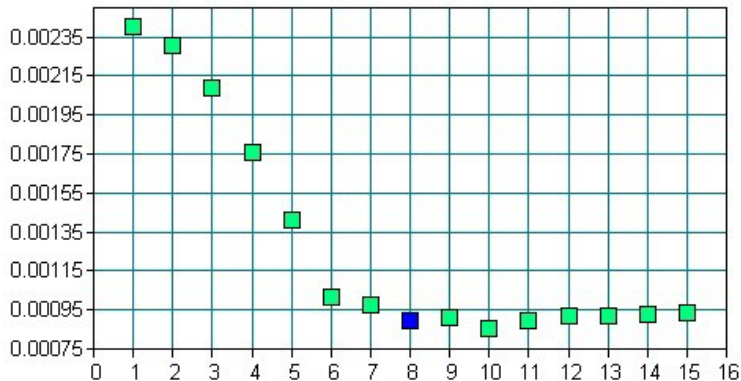

Empf. Rang: 8     $R^2 = 88.37$     RMSECV = 0.000894

Validation No 14    KAPKnauermitSpiegela-Dalle\_API-conc. in mg\_final.q2
