# Supplementary material for: Near-infrared spectroscopic identification and quantification of active pharmaceutical ingredients in closed capsules: a feasibility study for pediatric doses
Source: Royal Society of Chemistry journal article supplement (doi:10.1039/c9ay01241a), 2019-01-01
Supplement: c9ay01241a15.xlsx [file c9ay01241a15.xlsx]

## Sheet: Tabelle1
Charge	Messdatum	Nr.	Wirkstoff	WS-Konzentration	Zeitpunkt	Probe	Probenanzahl	Herstellender	Herstellung	Hersteller (WS)	Charge (WS)	Kapselhülle	Hersteller (KH)	Charge (KH)	Füllstoff	Hersteller (FS)	Charge (FS)	Kapselgröße	Scans Auflösung	Bemerkungen
S06A-01	2017-05-17	1	Sildenafilcitrat	2	t0	3	10	KS	2017-05-17	Caelo	16049812	HGK (weiß)	Capsula GmbH	10217027	Lactose-Aerosil	ZL	L-2017-0330-01	1	Var.: 128 8/ 64 8/ 32 8	Probe 1 und 2 nacheinander als Einzelmessungen, restl. 8 als Gebinde
S05A-01	2017-05-17	2	Sildenafilcitrat	2	t0	2	10	KS	2017-05-17	Caelo	16049812	HGK (weiß)	Capsula GmbH	10217027	Lactose-Aerosil	ZL	L-2017-0330-01	1	64 8
S04A-01	2017-05-17	3	Sildenafilcitrat	2	t0	1	10	KS	2017-05-17	Caelo	16049812	HGK (weiß)	Capsula GmbH	10217027	Lactose-Aerosil	ZL	L-2017-0330-01	1	64 8
H21-01	2017-05-22	50	Hydrochlorothiazid	2	t0	1	10	AJ	2017-05-22	Caelo	16269301	HGK (klar)	Capsula GmbH	10217057	Mannitol-Aerosil	ZL	M-2017-0330-01	1	64 8
H22-01	2017-05-22	51	Hydrochlorothiazid	2	t0	2	10	AJ	2017-05-22	Caelo	16269301	HGK (klar)	Capsula GmbH	10217057	Mannitol-Aerosil	ZL	M-2017-0330-01	1	64 8
H23-01	2017-05-22	52	Hydrochlorothiazid	2	t0	3	10	AJ	2017-05-22	Caelo	16269301	HGK (klar)	Capsula GmbH	10217057	Mannitol-Aerosil	ZL	M-2017-0330-01	1	64 8	Probe 9: kurz Spiegel nicht drauf (minimal)
H24-01	2017-05-22	53	Hydrochlorothiazid	2	t0	1	10	AJ	2017-05-22	Caelo	16269301	HGK (klar)	Capsula GmbH	10217057	Lactose-Aerosil	ZL	L-2017-0330-01	1	64 8
H25-01	2017-05-22	54	Hydrochlorothiazid	2	t0	2	10	AJ	2017-05-22	Caelo	16269301	HGK (klar)	Capsula GmbH	10217057	Lactose-Aerosil	ZL	L-2017-0330-01	1	64 8
H26-01	2017-05-22	55	Hydrochlorothiazid	2	t0	3	10	AJ	2017-05-22	Caelo	16269301	HGK (klar)	Capsula GmbH	10217057	Lactose-Aerosil	ZL	L-2017-0330-01	1	64 8
H27-01	2017-05-22	56	Hydrochlorothiazid	2	t0	1	10	AJ	2017-05-22	Caelo	16269301	HGK (klar)	Capsula GmbH	10217057	Mikrokristalline Cellulose-Aerosil	ZL	MK-2017-0330-01	1	64 8
H28-01	2017-05-23	82	Hydrochlorothiazid	2	t0	2	10	AJ	2017-05-23	Caelo	16269301	HGK (klar)	Capsula GmbH	10217057	Mikrokristalline Cellulose-Aerosil	ZL	MK-2017-0330-01	1	128 8
H29-01	2017-05-23	83	Hydrochlorothiazid	2	t0	3	10	AJ	2017-05-23	Caelo	16269301	HGK (klar)	Capsula GmbH	10217057	Mikrokristalline Cellulose-Aerosil	ZL	MK-2017-0330-01	1	128 8
C21A-01	2017-05-23	84	Captopril	2	t0	1	10	KS	2017-05-23	Caelo	1518951	HGK (klar)	Capsula GmbH	10217057	Mannitol-Aerosil	ZL	M-2017-0330-01	1	128 8
C11-03	2017-05-23	85	Captopril	2	t28	1	10	KS	2017-04-25	Caelo	1518951	Zellulose (weiß)	Capsula GmbH	10217051	Mannitol-Aerosil	ZL	M-2017-0330-01	1	128 8	laut Herstellungsprotokoll: C11 bis C19 Zellulose (weiß) Abweichung nach Studienplan: Hypromellose?!
C12-03	2017-05-23	86	Captopril	2	t28	2	10	KS	2017-04-25	Caelo	1518951	Zellulose (weiß)	Capsula GmbH	10217051	Mannitol-Aerosil	ZL	M-2017-0330-01	1	128 8
C13-03	2017-05-23	87	Captopril	2	t28	3	10	KS	2017-04-25	Caelo	1518951	Zellulose (weiß)	Capsula GmbH	10217051	Mannitol-Aerosil	ZL	M-2017-0330-01	1	128 8
C14-03	2017-05-23	88	Captopril	2	t28	1	10	KS	2017-04-25	Caelo	1518951	Zellulose (weiß)	Capsula GmbH	10217051	Lactose-Aerosil	ZL	L-2017-0330-01	1	128 8
C15-03	2017-05-23	89	Captopril	2	t28	2	10	KS	2017-04-25	Caelo	1518951	Zellulose (weiß)	Capsula GmbH	10217051	Lactose-Aerosil	ZL	L-2017-0330-01	1	128 8
C16-03	2017-05-23	90	Captopril	2	t28	3	10	KS	2017-04-25	Caelo	1518951	Zellulose (weiß)	Capsula GmbH	10217051	Lactose-Aerosil	ZL	L-2017-0330-01	1	128 8
C17-03	2017-05-23	91	Captopril	2	t28	1	10	KS	2017-04-25	Caelo	1518951	Zellulose (weiß)	Capsula GmbH	10217051	Mikrokristalline Cellulose-Aerosil	ZL	MK-2017-0330-01	1	128 8
C18-03	2017-05-23	92	Captopril	2	t28	2	10	KS	2017-04-25	Caelo	1518951	Zellulose (weiß)	Capsula GmbH	10217051	Mikrokristalline Cellulose-Aerosil	ZL	MK-2017-0330-01	1	128 8
C19-03	2017-05-23	93	Captopril	2	t28	3	10	KS	2017-04-25	Caelo	1518951	Zellulose (weiß)	Capsula GmbH	10217051	Mikrokristalline Cellulose-Aerosil	ZL	MK-2017-0330-01	1	128 8
C22-02	2017-05-23	94	Captopril	2	t14	2	10	KS	2017-05-09	Caelo	1518951	HGK (klar)	Capsula GmbH	10217054	Mannitol-Aerosil	ZL	M-2017-0330-01	1	128 8	2 Proben falsch beschriftet: weiß statt klare HGK
C23-02	2017-05-23	95	Captopril	2	t14	3	10	KS	2017-05-09	Caelo	1518951	HGK (klar)	Capsula GmbH	10217054	Mannitol-Aerosil	ZL	M-2017-0330-01	1	128 8
C24-02	2017-05-23	96	Captopril	2	t14	1	10	KS	2017-05-09	Caelo	1518951	HGK (klar)	Capsula GmbH	10217054	Lactose-Aerosil	ZL	L-2017-0330-01	1	128 8
C25-02	2017-05-23	97	Captopril	2	t14	2	10	KS	2017-05-09	Caelo	1518951	HGK (klar)	Capsula GmbH	10217054	Lactose-Aerosil	ZL	L-2017-0330-01	1	128 8
C26-02	2017-05-23	98	Captopril	2	t14	3	10	KS	2017-05-09	Caelo	1518951	HGK (klar)	Capsula GmbH	10217054	Lactose-Aerosil	ZL	L-2017-0330-01	1	128 8
C27-02	2017-05-23	99	Captopril	2	t14	1	10	KS	2017-05-09	Caelo	1518951	HGK (klar)	Capsula GmbH	10217054	Mikrokristalline Cellulose-Aerosil	ZL	MK-2017-0330-01	1	128 8
C28-02	2017-05-23	100	Captopril	2	t14	2	10	KS	2017-05-09	Caelo	1518951	HGK (klar)	Capsula GmbH	10217054	Mikrokristalline Cellulose-Aerosil	ZL	MK-2017-0330-01	1	128 8
C29-02	2017-05-23	101	Captopril	2	t14	3	10	KS	2017-05-09	Caelo	1518951	HGK (klar)	Capsula GmbH	10217054	Mikrokristalline Cellulose-Aerosil	ZL	MK-2017-0330-01	1	128 8
C31-02 WDH	2017-05-23	102	Captopril	2	t14	1	10	KS	2017-05-09	Caelo	1518951	HGK (weiß)	Capsula GmbH	10217027	Mannitol-Aerosil	ZL	M-2017-0330-01	1	128 8
C32-02 WDH	2017-05-23	103	Captopril	2	t14	2	10	KS	2017-05-09	Caelo	1518951	HGK (weiß)	Capsula GmbH	10217027	Mannitol-Aerosil	ZL	M-2017-0330-01	1	128 8
C33-02 WDH	2017-05-23	104	Captopril	2	t14	3	10	KS	2017-05-09	Caelo	1518951	HGK (weiß)	Capsula GmbH	10217027	Mannitol-Aerosil	ZL	M-2017-0330-01	1	128 8
S21-01	2017-05-29	219	Sildenafilcitrat	2	t0	1	10	KS	2017-05-29	Caelo	16049821	HGK (klar)	Capsula GmbH	10217054	Mannitol-Aerosil	ZL	M-2017-0330-01	1	128 8	bei Probe 1 Stempel vergessen, als Einzelmessung anschl. Erneut mit Stempel vermessen
S22-01	2017-05-29	220	Sildenafilcitrat	2	t0	2	10	KS	2017-05-29	Caelo	16049821	HGK (klar)	Capsula GmbH	10217054	Mannitol-Aerosil	ZL	M-2017-0330-01	1	128 8
S23-01	2017-05-29	221	Sildenafilcitrat	2	t0	3	10	KS	2017-05-30	Caelo	16049821	HGK (klar)	Capsula GmbH	10217054	Mannitol-Aerosil	ZL	M-2017-0330-01	1	128 8
S24-01	2017-05-29	222	Sildenafilcitrat	2	t0	1	10	KS	2017-05-29	Caelo	16049821	HGK (klar)	Capsula GmbH	10217054	Lactose-Aerosil	ZL	L-2017-0330-01	1	128 8
S25-01	2017-05-29	223	Sildenafilcitrat	2	t0	2	10	KS	2017-05-29	Caelo	16049821	HGK (klar)	Capsula GmbH	10217054	Lactose-Aerosil	ZL	L-2017-0330-01	1	128 8
S26-01	2017-05-29	224	Sildenafilcitrat	2	t0	3	10	KS	2017-05-29	Caelo	16049821	HGK (klar)	Capsula GmbH	10217054	Lactose-Aerosil	ZL	L-2017-0330-01	1	128 8
S27-01	2017-05-30	236	Sildenafilcitrat	2	t0	1	10	KS	2017-05-30	Caelo	16049821	HGK (klar)	Capsula GmbH	10217054	Mikrokristalline Cellulose-Aerosil	ZL	MK-2017-0330-01	1	128 8
S28-01	2017-05-30	237	Sildenafilcitrat	2	t0	2	10	KS	2017-05-30	Caelo	16049821	HGK (klar)	Capsula GmbH	10217054	Mikrokristalline Cellulose-Aerosil	ZL	MK-2017-0330-01	1	128 8
S29-01	2017-05-30	238	Sildenafilcitrat	2	t0	3	10	KS	2017-05-30	Caelo	16049821	HGK (klar)	Capsula GmbH	10217054	Mikrokristalline Cellulose-Aerosil	ZL	MK-2017-0330-01	1	128 8
S07-03	2017-05-30	239	Sildenafilcitrat	2	t28	1	10	KS	2017-05-03	Caelo	16049812	HGK (weiß)	Capsula GmbH	10217027	Mikrokristalline Cellulose-Aerosil	ZL	MK-2017-0330-01	1	128 8
S08-03	2017-05-30	240	Sildenafilcitrat	2	t28	2	10	KS	2017-05-03	Caelo	16049812	HGK (weiß)	Capsula GmbH	10217027	Mikrokristalline Cellulose-Aerosil	ZL	MK-2017-0330-01	1	128 8	Probe 2: S09-03-1 ausversehen vermessen, Probe anschließend als Einzelmessung wiederholt
S09-03	2017-05-30	241	Sildenafilcitrat	2	t28	3	10	KS	2017-05-03	Caelo	16049812	HGK (weiß)	Capsula GmbH	10217027	Mikrokristalline Cellulose-Aerosil	ZL	MK-2017-0330-01	1	128 8
S11-02	2017-05-30	242	Sildenafilcitrat	2	t14	1	10	KS	2017-05-16	Caelo	16049812	Zellulose (weiß)	Capsula GmbH	10217051	Mannitol-Aerosil	ZL	M-2017-0330-01	1	128 8
S12-02	2017-05-30	243	Sildenafilcitrat	2	t14	2	10	KS	2017-05-16	Caelo	16049812	Zellulose (weiß)	Capsula GmbH	10217051	Mannitol-Aerosil	ZL	M-2017-0330-01	1	128 8
S13-02	2017-05-30	244	Sildenafilcitrat	2	t14	3	10	KS	2017-05-16	Caelo	16049812	Zellulose (weiß)	Capsula GmbH	10217051	Mannitol-Aerosil	ZL	M-2017-0330-01	1	128 8
S14-02	2017-05-30	245	Sildenafilcitrat	2	t14	1	10	KS	2017-05-16	Caelo	16049812	Zellulose (weiß)	Capsula GmbH	10217051	Lactose-Aerosil	ZL	L-2017-0330-01	1	128 8	Probe 7: Spiegel kurz runtergefallen!
S15-02	2017-05-30	246	Sildenafilcitrat	2	t14	2	10	KS	2017-05-16	Caelo	16049812	Zellulose (weiß)	Capsula GmbH	10217051	Lactose-Aerosil	ZL	L-2017-0330-01	1	128 8
S16-02	2017-05-30	247	Sildenafilcitrat	2	t14	3	10	KS	2017-05-16	Caelo	16049812	Zellulose (weiß)	Capsula GmbH	10217051	Lactose-Aerosil	ZL	L-2017-0330-01	1	128 8
S04A-02	2017-05-30	248	Sildenafilcitrat	2	t14	1	10	KS	2017-05-17	Caelo	16049812	HGK (weiß)	Capsula GmbH	10217027	Lactose-Aerosil	ZL	L-2017-0330-01	1	128 8
S05A-02	2017-05-30	249	Sildenafilcitrat	2	t14	2	10	KS	2017-05-17	Caelo	16049812	HGK (weiß)	Capsula GmbH	10217027	Lactose-Aerosil	ZL	L-2017-0330-01	1	128 8
S06A-02	2017-05-30	250	Sildenafilcitrat	2	t14	3	10	KS	2017-05-17	Caelo	16049812	HGK (weiß)	Capsula GmbH	10217027	Lactose-Aerosil	ZL	L-2017-0330-01	1	128 8
S17-01	2017-05-30	251	Sildenafilcitrat	2	t0	1	10	KS	2017-05-30	Caelo	16049821	Zellulose (weiß)	Capsula GmbH	10217051	Mikrokristalline Cellulose-Aerosil	ZL	MK-2017-0330-01	1	128 8
S18-01	2017-05-30	252	Sildenafilcitrat	2	t0	2	10	KS	2017-05-30	Caelo	16049821	Zellulose (weiß)	Capsula GmbH	10217051	Mikrokristalline Cellulose-Aerosil	ZL	MK-2017-0330-01	1	128 8
S19-01	2017-05-30	253	Sildenafilcitrat	2	t0	3	10	KS	2017-05-30	Caelo	16049821	Zellulose (weiß)	Capsula GmbH	10217051	Mikrokristalline Cellulose-Aerosil	ZL	MK-2017-0330-01	1	128 8
S01A-01	2017-05-31	286	Sildenafilcitrat	2	t0	1	10	KS	2017-06-01	Caelo	16049821	HGK (weiß)	Capsula GmbH	10217027	Mannitol-Aerosil	ZL	M-2017-0330-01	1	128 8
S02A-01	2017-05-31	287	Sildenafilcitrat	2	t0	2	10	KS	2017-06-01	Caelo	16049821	HGK (weiß)	Capsula GmbH	10217027	Mannitol-Aerosil	ZL	M-2017-0330-01	1	128 8
S03A-01	2017-05-31	288	Sildenafilcitrat	2	t0	3	10	KS	2017-05-31	Caelo	16049821	HGK (weiß)	Capsula GmbH	10217027	Mannitol-Aerosil	ZL	M-2017-0330-01	1	128 8
H07A-03	2017-06-01	335	Hydrochlorothiazid	2	t28	1	10	AJ	2017-05-04	Caelo	16269301	HGK (weiß)	Capsula GmbH	10217027	Mikrokristalline Cellulose-Aerosil	ZL	MK-2017-0330-01	1	128 8	Probe 5: Spiegel kurz zu anfang nicht drauf
H08A-03	2017-06-01	336	Hydrochlorothiazid	2	t28	2	10	AJ	2017-05-04	Caelo	16269301	HGK (weiß)	Capsula GmbH	10217027	Mikrokristalline Cellulose-Aerosil	ZL	MK-2017-0330-01	1	128 8
H09A-03	2017-06-01	337	Hydrochlorothiazid	2	t28	3	10	AJ	2017-05-04	Caelo	16269301	HGK (weiß)	Capsula GmbH	10217027	Mikrokristalline Cellulose-Aerosil	ZL	MK-2017-0330-01	1	128 8
H14A-03	2017-06-01	338	Hydrochlorothiazid	2	t28	1	10	AJ	2017-05-03	Caelo	16269301	Zellulose (weiß)	Capsula GmbH	10217051	Lactose-Aerosil	ZL	L-2017-0330-01	1	128 8
H15A-03	2017-06-01	339	Hydrochlorothiazid	2	t28	2	10	AJ	2017-05-03	Caelo	16269301	Zellulose (weiß)	Capsula GmbH	10217051	Lactose-Aerosil	ZL	L-2017-0330-01	1	128 8
H16A-03	2017-06-01	340	Hydrochlorothiazid	2	t28	3	10	AJ	2017-05-03	Caelo	16269301	Zellulose (weiß)	Capsula GmbH	10217051	Lactose-Aerosil	ZL	L-2017-0330-01	1	128 8
H17A-03	2017-06-01	341	Hydrochlorothiazid	2	t28	1	10	AJ	2017-05-04	Caelo	16269301	Zellulose (weiß)	Capsula GmbH	10217051	Mikrokristalline Cellulose-Aerosil	ZL	MK-2017-0330-01	1	128 8
H18A-03	2017-06-01	342	Hydrochlorothiazid	2	t28	2	10	AJ	2017-05-04	Caelo	16269301	Zellulose (weiß)	Capsula GmbH	10217051	Mikrokristalline Cellulose-Aerosil	ZL	MK-2017-0330-01	1	128 8
H19A-03	2017-06-01	343	Hydrochlorothiazid	2	t28	3	10	AJ	2017-05-04	Caelo	16269301	Zellulose (weiß)	Capsula GmbH	10217051	Mikrokristalline Cellulose-Aerosil	ZL	MK-2017-0330-01	1	128 8
S17-02	2017-06-13	372	Sildenafilcitrat	2	t14	1	10	KS	2017-05-30	Caelo	16049821	Zellulose (weiß)	Capsula GmbH	10217051	Mikrokristalline Cellulose-Aerosil	ZL	MK-2017-0330-01	1	128 8
S18-02	2017-06-13	373	Sildenafilcitrat	2	t14	2	10	KS	2017-05-30	Caelo	16049821	Zellulose (weiß)	Capsula GmbH	10217051	Mikrokristalline Cellulose-Aerosil	ZL	MK-2017-0330-01	1	128 8
S19-02	2017-06-13	374	Sildenafilcitrat	2	t14	3	10	KS	2017-05-30	Caelo	16049821	Zellulose (weiß)	Capsula GmbH	10217051	Mikrokristalline Cellulose-Aerosil	ZL	MK-2017-0330-01	1	128 8
S21-02	2017-06-13	375	Sildenafilcitrat	2	t14	1	10	KS	2017-05-29	Caelo	16049821	HGK (klar)	Capsula GmbH	10217054	Mannitol-Aerosil	ZL	M-2017-0330-01	1	128 8
S22-02	2017-06-13	376	Sildenafilcitrat	2	t14	2	10	KS	2017-05-29	Caelo	16049821	HGK (klar)	Capsula GmbH	10217054	Mannitol-Aerosil	ZL	M-2017-0330-01	1	128 8
S23-02	2017-06-13	377	Sildenafilcitrat	2	t14	3	10	KS	2017-05-30	Caelo	16049821	HGK (klar)	Capsula GmbH	10217054	Mannitol-Aerosil	ZL	M-2017-0330-01	1	128 8
S24-02	2017-06-13	378	Sildenafilcitrat	2	t14	1	10	KS	2017-05-29	Caelo	16049821	HGK (klar)	Capsula GmbH	10217054	Lactose-Aerosil	ZL	L-2017-0330-01	1	128 8
S25-02	2017-06-13	379	Sildenafilcitrat	2	t14	2	10	KS	2017-05-29	Caelo	16049821	HGK (klar)	Capsula GmbH	10217054	Lactose-Aerosil	ZL	L-2017-0330-01	1	128 8
S26-02	2017-06-13	380	Sildenafilcitrat	2	t14	3	10	KS	2017-05-29	Caelo	16049821	HGK (klar)	Capsula GmbH	10217054	Lactose-Aerosil	ZL	L-2017-0330-01	1	128 8
S27-02	2017-06-13	381	Sildenafilcitrat	2	t14	1	10	KS	2017-05-30	Caelo	16049821	HGK (klar)	Capsula GmbH	10217054	Mikrokristalline Cellulose-Aerosil	ZL	MK-2017-0330-01	1	128 8
S28-02	2017-06-13	382	Sildenafilcitrat	2	t14	2	10	KS	2017-05-30	Caelo	16049821	HGK (klar)	Capsula GmbH	10217054	Mikrokristalline Cellulose-Aerosil	ZL	MK-2017-0330-01	1	128 8
S29-02	2017-06-13	383	Sildenafilcitrat	2	t14	3	10	KS	2017-05-30	Caelo	16049821	HGK (klar)	Capsula GmbH	10217054	Mikrokristalline Cellulose-Aerosil	ZL	MK-2017-0330-01	1	128 8
S01A-02	2017-06-13	384	Sildenafilcitrat	2	t14	1	10	KS	2017-06-01	Caelo	16049821	HGK (weiß)	Capsula GmbH	10217027	Mannitol-Aerosil	ZL	M-2017-0330-01	1	128 8
S02A-02	2017-06-13	385	Sildenafilcitrat	2	t14	2	10	KS	2017-06-01	Caelo	16049821	HGK (weiß)	Capsula GmbH	10217027	Mannitol-Aerosil	ZL	M-2017-0330-01	1	128 8
S03A-02	2017-06-13	386	Sildenafilcitrat	2	t14	3	10	KS	2017-05-31	Caelo	16049821	HGK (weiß)	Capsula GmbH	10217027	Mannitol-Aerosil	ZL	M-2017-0330-01	1	128 8
S11-03	2017-06-13	387	Sildenafilcitrat	2	t28	1	10	KS	2017-05-16	Caelo	16049812	Zellulose (weiß)	Capsula GmbH	10217051	Mannitol-Aerosil	ZL	M-2017-0330-01	1	128 8
S12-03	2017-06-13	388	Sildenafilcitrat	2	t28	2	10	KS	2017-05-16	Caelo	16049812	Zellulose (weiß)	Capsula GmbH	10217051	Mannitol-Aerosil	ZL	M-2017-0330-01	1	128 8
S13-03	2017-06-13	389	Sildenafilcitrat	2	t28	3	10	KS	2017-05-16	Caelo	16049812	Zellulose (weiß)	Capsula GmbH	10217051	Mannitol-Aerosil	ZL	M-2017-0330-01	1	128 8
S14-03	2017-06-13	390	Sildenafilcitrat	2	t28	1	10	KS	2017-05-16	Caelo	16049812	Zellulose (weiß)	Capsula GmbH	10217051	Lactose-Aerosil	ZL	L-2017-0330-01	1	128 8
S15-03	2017-06-13	391	Sildenafilcitrat	2	t28	2	10	KS	2017-05-16	Caelo	16049812	Zellulose (weiß)	Capsula GmbH	10217051	Lactose-Aerosil	ZL	L-2017-0330-01	1	128 8
S16-03	2017-06-13	392	Sildenafilcitrat	2	t28	3	10	KS	2017-05-16	Caelo	16049812	Zellulose (weiß)	Capsula GmbH	10217051	Lactose-Aerosil	ZL	L-2017-0330-01	1	128 8
S04A-03	2017-06-13	393	Sildenafilcitrat	2	t28	1	10	KS	2017-05-17	Caelo	16049812	HGK (weiß)	Capsula GmbH	10217027	Lactose-Aerosil	ZL	L-2017-0330-01	1	128 8
S05A-03	2017-06-13	394	Sildenafilcitrat	2	t28	2	10	KS	2017-05-17	Caelo	16049812	HGK (weiß)	Capsula GmbH	10217027	Lactose-Aerosil	ZL	L-2017-0330-01	1	128 8
S06A-03	2017-06-13	395	Sildenafilcitrat	2	t28	3	10	KS	2017-05-17	Caelo	16049812	HGK (weiß)	Capsula GmbH	10217027	Lactose-Aerosil	ZL	L-2017-0330-01	1	128 8
