# Supplementary figures and images for: Near-infrared spectroscopic identification and quantification of active pharmaceutical ingredients in closed capsules: a feasibility study for pediatric doses
Source: Royal Society of Chemistry journal article supplement (doi:10.1039/c9ay01241a), 2019-01-01

### RMSECV vs Rang / Nom. API-concentr. [%] / Kreuzvalidierung

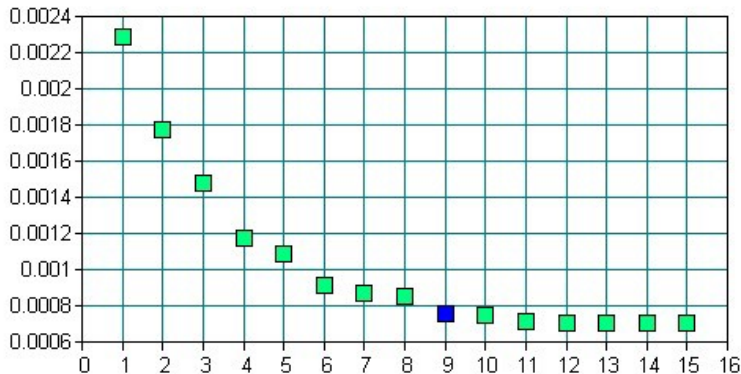

Empf. Rang: 9     $R^2 = 91.59$     RMSECV = 0.00076  
Validation No 4

Supplement: c9ay01241a11.pdf [file c9ay01241a11.pdf]

### Vorhersage vs Wahr / Nom. API-concentr. [%] / Kreuzvalidierung

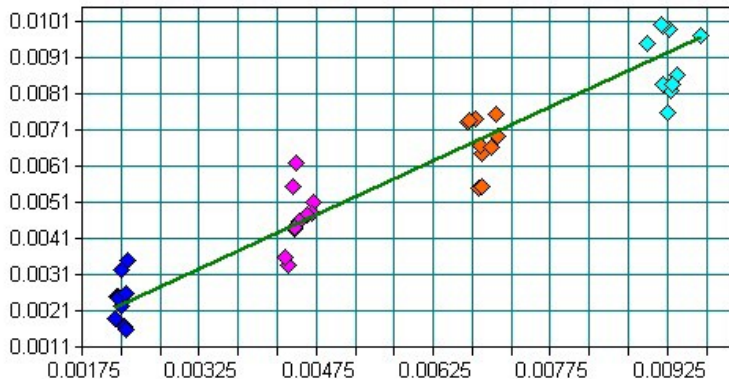

Rang: 9     $R^2 = 91.59$     RMSECV = 0.00076    Bias: 2.21E-005    RPD: 3.45  
Validation No 4

Supplement: c9ay01241a3.pdf [file c9ay01241a3.pdf]

### Vorhersage vs Wahr / Nom. API-concentr. [%] / Kreuzvalidierung

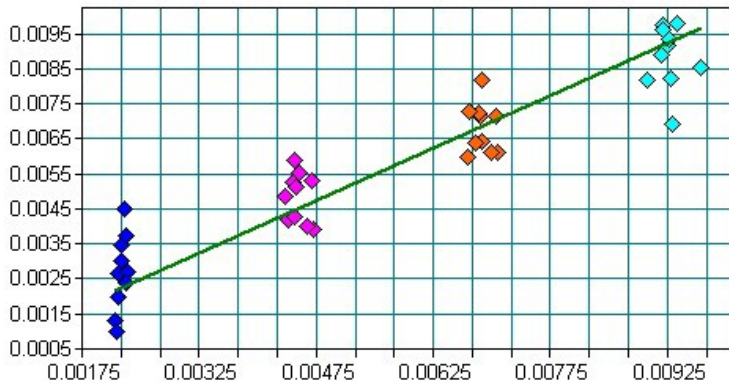

Rang: 8     $R^2 = 88.37$     RMSECV = 0.000894    Bias: -6.13E-005    RPD: 2.94

Supplement: c9ay01241a6.pdf [file c9ay01241a6.pdf]

### RMSECV vs Rang / API-Konz. [%] / Kreuzvalidierung

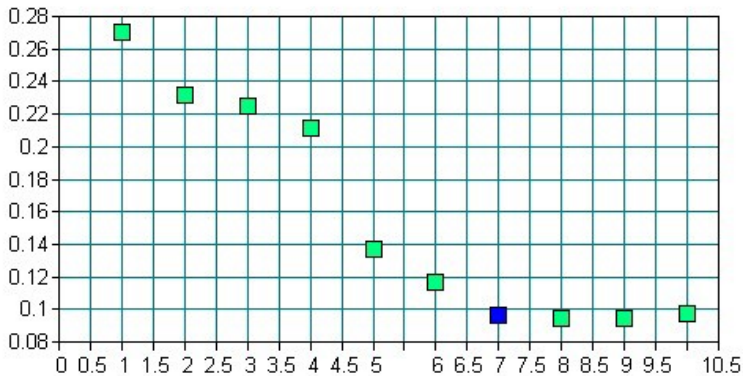

Empf. Rang: 7     $R^2 = 87.68$     RMSECV = 0.0963

Validation No 2 +

Supplement: c9ay01241a7.pdf [file c9ay01241a7.pdf]
